# Supplementary material for: Level of option B+PMTCT drug adherence with male partner involvement and associated factors among breastfeeding women until 18 months in North Gojjam Zone, Amhara region, Northwest Ethiopia, 2022: a multicentre cross-sectional study
Source: HighWire-hosted journal article supplement (doi:10.1136/bmjopen-2024-086374), 2024-10-01
Supplement: bmjopen-2024-086374supp001_data_supplement.pdf [file bmjopen-2024-086374supp001_data_supplement.pdf]

Information& consent form

Good morning/afternoon/ my name is ..... I am working as a data collector in the study conducted by Tegegne Wale in the midwifery department, college of Health Science of Debre Tabor University. The objective of this study is to assess the level of option B + PMTCT drugs adherence and associated factors among HIV positive breastfeeding women until eighteen months in governmental hospitals of Gojam zone, Northwest Ethiopia. I am interviewing HIV-positive breastfeeding mothers until 18 months who are on option B plus PMTCT service. So your cooperation has a great role in the fruit fullness of this study. You do not have to answer any questions that you do not want to answer, and you may end this interview at any time you want. Any care or service provision never be discontinued related to your refusal to participate in this study. The care & support will continue even if you don't accept this study. You can change your idea at any time even if you accept the study.

**Risks:** by participating in this study you will not face any risk but if you suspect any risk or have questions you can ask at any time.

**Benefits incentives:** No incentives you for to participate in this study. However, the aim of this study is to any children not born with HIV.

**Confidentiality:** Your information will not be disclosed to anyone except by the investigator. Your name will not be written in the paper but by only coding. This code is known only by the data collector. The data may be seen by investigators, advisors, and data collectors but for others not be disclosed

**Share the findings:** If you want to know the findings at the end of the study we can communicate. The result of the study will be disseminated to different scholars, scientific communities & others who want to know.

**Time of interview:** The interview will take about 20-30 minutes

If you have questions about this study, you can ask.

Principal investigator: Tegegne wale

Mobile number. +252918581910/email [tegegnewale10@gmail.com](mailto:tegegnewale10@gmail.com)

Would you Participant in our study? A. Yes B. No

If yes continue or if no give thanks & precede to other participant

Signature of participate

Date of interview ... Name of data collector..... Date ...../.....Signature.....

English version questionnaire

Part 1: Questions on sociodemographic characteristics of participants in government hospitals of North Gojam zone

|      |           |          |  |  |         |
|------|-----------|----------|--|--|---------|
| s.no | Variables | Response |  |  | Skip to |
|------|-----------|----------|--|--|---------|

|     |                                              |                       |  |  |  |
|-----|----------------------------------------------|-----------------------|--|--|--|
| 101 | Age in years                                 | -----                 |  |  |  |
| 102 | Place of residence                           | Rural                 |  |  |  |
|     |                                              | Urban                 |  |  |  |
| 103 | What is your religion?                       | Orthodox Christian    |  |  |  |
|     |                                              | Muslim                |  |  |  |
|     |                                              | Protestant Christian  |  |  |  |
|     |                                              | Catholic              |  |  |  |
| 104 | What is your marital status?                 | Single                |  |  |  |
|     |                                              | Married               |  |  |  |
|     |                                              | Divorced              |  |  |  |
|     |                                              | Windowed              |  |  |  |
| 105 | What is your level of education?             | No formal education   |  |  |  |
|     |                                              | Primary (grade1-8)    |  |  |  |
|     |                                              | Secondary(grade 9-12) |  |  |  |
|     |                                              | Diploma               |  |  |  |
|     |                                              | Technical/vocational  |  |  |  |
| 106 | What is your occupation currently?           | Degree and above      |  |  |  |
|     |                                              | House wife            |  |  |  |
|     |                                              | Merchant              |  |  |  |
|     |                                              | Private employee      |  |  |  |
|     |                                              | Governmental employee |  |  |  |
|     |                                              | Student               |  |  |  |
| 107 | Types of health facilities                   | .....                 |  |  |  |
|     | Time taken to reach home to facility on foot |                       |  |  |  |

## Part 2: HIV status disclosure among breastfeeding mothers until 18 months in governmental hospitals of North Gojam zone

| s.no | Question                                             | Response                               | Skip to            |
|------|------------------------------------------------------|----------------------------------------|--------------------|
| 201  | Have you disclosed your status to anyone?            | Yes<br>No                              | If no go to qn.204 |
| 202  | For Whom did you disclose your status?               | Partner<br>Family<br>friend    other__ |                    |
| 203  | Did they help you take your pills regularly on time? | Yes<br>No                              |                    |
| 204  | Is your partner HIV positive?                        | Yes<br>No<br>Don't know                |                    |
| 205  | Is He on medication                                  | Yes<br>No<br>Don't know                |                    |

## Part 3: HIV disease &amp; treatment related questions among breastfeeding mothers until 18 months in governmental health hospitals of North Gojam zone

| s.no | Questions                           | Response                      | Skip to                |
|------|-------------------------------------|-------------------------------|------------------------|
| 301  | WHO clinical category at admission? | Stage 1<br>Stage 2<br>Stage 3 | Review Patient Medical |

|     |                                                                                                  |                                                                                                                                     |                             |
|-----|--------------------------------------------------------------------------------------------------|-------------------------------------------------------------------------------------------------------------------------------------|-----------------------------|
|     |                                                                                                  | Stage 4                                                                                                                             | record                      |
| 302 | WHO clinical category during the study time                                                      | Stage 1<br>Stage 2                                                                                                                  |                             |
| 303 | Did you start your ART with CD4 count or clinical stage?                                         | Yes<br>No                                                                                                                           |                             |
| 304 | CD4 count at admission, cells/mm3                                                                | .....                                                                                                                               | Review Card                 |
| 305 | When you started your option B+ drugs?                                                           | During this pregnancy<br>During breast feeding<br>Previously known                                                                  |                             |
| 306 | Do you think HIV testing & taking ARV treatment at the same day of HIV diagnosis is challenging? | yes<br>No                                                                                                                           | If no<br>Skip to<br>q.n 308 |
| 307 | What are the challenges?                                                                         | Difficulty in early decision,<br>Fear of side effect of drug,<br>Fear of stigma,<br>difficult To disclose to partner<br>Others_____ |                             |
| 308 | HIV status at PMTCT enrolment                                                                    | Newly diagnosed during breastfeeding<br>Already known HIV Status<br>Newly diagnosed during pregnancy pregnancy                      |                             |
| 309 | Did you counseled about side effect of ART drug?                                                 | Yes<br>No                                                                                                                           |                             |
| 310 | How long you counseled                                                                           |                                                                                                                                     |                             |
| 311 | Have you experienced any side Effects of the medicines You are taking?                           | Yes<br>No                                                                                                                           | If no<br>skip<br>q.n 401    |
| 312 | What did you experience?                                                                         | Nausea<br>Vomiting<br>Dizziness<br>Skin rash<br>Other_____                                                                          |                             |
| 313 | Were the medicine(s) changed for you After the experience of side effect?                        | Yes<br>No                                                                                                                           |                             |

Part 4: Male partner involvement towards option B+ PMTCT drugs adherence in governmental hospitals of North Gojam zone

| s.no | Male involvement activities                          | Yes | No |
|------|------------------------------------------------------|-----|----|
| 401  | Shares his wife decisions on household issues        |     |    |
| 402  | Discusses with his wife on use of condom during sex  |     |    |
| 403  | Knows the frequency of taking PMTCT drug             |     |    |
| 404  | Visits PMTCT clinic with his wife to bring ARV drugs |     |    |

|     |                                                      |  |  |
|-----|------------------------------------------------------|--|--|
| 405 | Knows the name of PMTCT drugs                        |  |  |
| 406 | Knows the doses of PMTCT drugs                       |  |  |
| 407 | Discusses the advantages of ANC/PNC appointment      |  |  |
| 408 | Supports his wife financially to visit ANC/PNC PMTCT |  |  |
| 409 | Attends PMTCT with his wife                          |  |  |
| 410 | Reminds his wife about ANC/PNC appointment           |  |  |

Part 5: Knowledge questions regarding Option B+ PMTCT among breast feeding mothers until 18 months in governmental Hospitals of North Gojam zone

| s.no | Characteristics                                                                                              | Response  | Skip to |
|------|--------------------------------------------------------------------------------------------------------------|-----------|---------|
| 501  | Do you know how HIV is transmitted?                                                                          | Yes<br>No |         |
| 502  | Is there any means to avoid transmission of HIV from mother to her child                                     | Yes<br>No |         |
| 503  | Have you ever hearded about lifelong treatment of ART for any HIV positive pregnant & breast feeding mothers | Yes<br>No |         |
| 504  | Condom use can prevent HIV transmission during sex with an HIV infected partner                              | yes<br>no |         |
| 505  | HIV positive women can reduce the risk of HIV transmission to their babies if they take PMTCT drugs          | yes<br>no |         |
| 506  | Omitting to take some of the PMTCT drugs Has effect on the effectiveness of PMTCT care and support           | yes<br>no |         |
| 507  | Adhering to ARV drugs can reduce the risk of opportunistic infections                                        | yes<br>no |         |
| 508  | The support of male partner during PMTCT care does not have any effect on mothers adhering to PMTCT drugs    | yes<br>no |         |

Part 6: Assessment of level of adherence to option B+ PMTCT drugs among breast feeding women until eighteen months in governmental hospitals of North Gojam Zone by Self-reporting questions

| s.no | Questions                                                                                                           | Response  | Skip to |
|------|---------------------------------------------------------------------------------------------------------------------|-----------|---------|
| 601  | Do you sometimes find it difficult to remember to take your Medication?                                             | Yes<br>No |         |
| 602  | When you feel better, do you sometimes stop taking Your medication?                                                 | Yes<br>No |         |
| 603  | Many patients have troubles in taking their ARV doses as prescribed. did you miss any ARV doses in the last 3 days? | Yes<br>No |         |
| 604  | Sometimes if you feel worse when you take the medicine, do you stop taking it?                                      | Yes<br>No |         |
